# Supplementary material
Source: publisher figshare collection journal article supplement (https://karger.figshare.com/ndownloader/files/18736508)
Supplement: Supplementary file 1 [file 18736508]

**Supplementary appendix**

**Table S2:** QUADAS-2 assessment of risk of bias and applicability concerns

| **Study [Ref], year** | **Patient selection** | | | | **Index test** | **Reference standard** | **Flow and timing** | | |
| --- | --- | --- | --- | --- | --- | --- | --- | --- | --- |
|  | **1.**  **Was a retrospective (non-consecutive) inclusion of patients avoided?** | **2.**  **Were inappropriate exclusions avoided?** | **3.**  **Was a case-control design avoided?** | **4.**  **Did the included patients match the review question?** | **5.**  **Were endoscopists blinded to the final diagnosis?** | **6.**  **Was the reference standard likely to correctly classify the target condition?** | **7.**  **Was partial verification of patients with a non-diagnostic or non-malignant EBUS avoided?** | **8.**  **Was differential verification of patients with a non-diagnostic or non-malignant EBUS avoided?** | **9.**  **Were exclusions due to missing reference standard results avoided?** |
| Nakajima [9], 2008 |  | ? |  |  |  |  |  |  |  |
| Tournoy [14], 2008 |  |  |  |  |  |  |  |  |  |
| Eckhardt [15], 2010 |  | ? |  | ? |  |  |  |  |  |
| Khan [16], 2012 |  | ? |  | ? |  |  |  |  |  |
| Batthi [17], 2013 |  |  |  |  |  |  |  |  |  |
| Verma [18], 2013 |  | ? |  |  |  |  |  |  |  |
| Yang [19], 2013 |  | ? |  | ? |  | ? | ? | ? | ? |
| Zhao [20], 2013 |  | ? |  |  |  |  |  |  |  |
| Evison [21], 2013 |  | ? |  |  |  | ? | ? | ? |  |
| Argento [22], 2016 |  | ? |  |  |  |  |  |  |  |
| Chen [23], 2017 |  |  |  |  |  |  |  |  |  |
| Almeida [24], 2018 |  |  |  | ? |  |  |  |  |  |
| Guarize [25], 2018 |  | ? |  | ? |  | ? | ? | ? |  |
| Chaiyakul [26], 2018 |  | ? |  |  |  |  |  |  |  |

Low risk of bias/applicability concerns High risk of bias/applicability concerns ? Unclear risk of bias/applicability concerns
